# Supplementary material
Source: PubMed Central journal article supplement (PMC6326775)

# Supporting Information

for

## Triazole-linked transition state analogs as selective inhibitors against *V. cholerae* sialidase

Teri J. Slack,<sup>#a</sup> Wanqing Li,<sup>#a</sup> Dashuang Shi,<sup>b</sup> John B. McArthur,<sup>a</sup> Gengxiang Zhao,<sup>b</sup> Yanhong Li,<sup>a</sup> An Xiao,<sup>a</sup> Zahra Khedri,<sup>a</sup> Hai Yu,<sup>a</sup> Yang Liu,<sup>b,&</sup> and Xi Chen<sup>a,\*</sup>

<sup>a</sup>Department of Chemistry, University of California-Davis, One Shields Avenue, Davis, CA 95616, USA

<sup>b</sup>Center for Genetic Medicine Research, Children's National Medical Center, 111 Michigan Ave, NW, Washington DC 20012, USA

<sup>#</sup> These authors contributed equality to this work.

<sup>&</sup> Current address: Division of Immunotherapy, Institute of Human Virology, University of Maryland, Baltimore, MD 21201, United States

\* Corresponding author. Tel: +1 530 754 6037; fax: +1 530 752 8995. *E-mail address:* [xiichen@ucdavis.edu](mailto:xiichen@ucdavis.edu) (X. Chen).

### Table of Contents

**Figure S1.** Multiple sequence alignment (MSA) of sialidases tested in the current study.....S2

<sup>1</sup>H and <sup>13</sup>C NMR spectra of compounds **3–8**.....S3–S8



$^1\text{H}$  and  $^{13}\text{C}$  NMR spectra of (propargyl)-A (**3**)

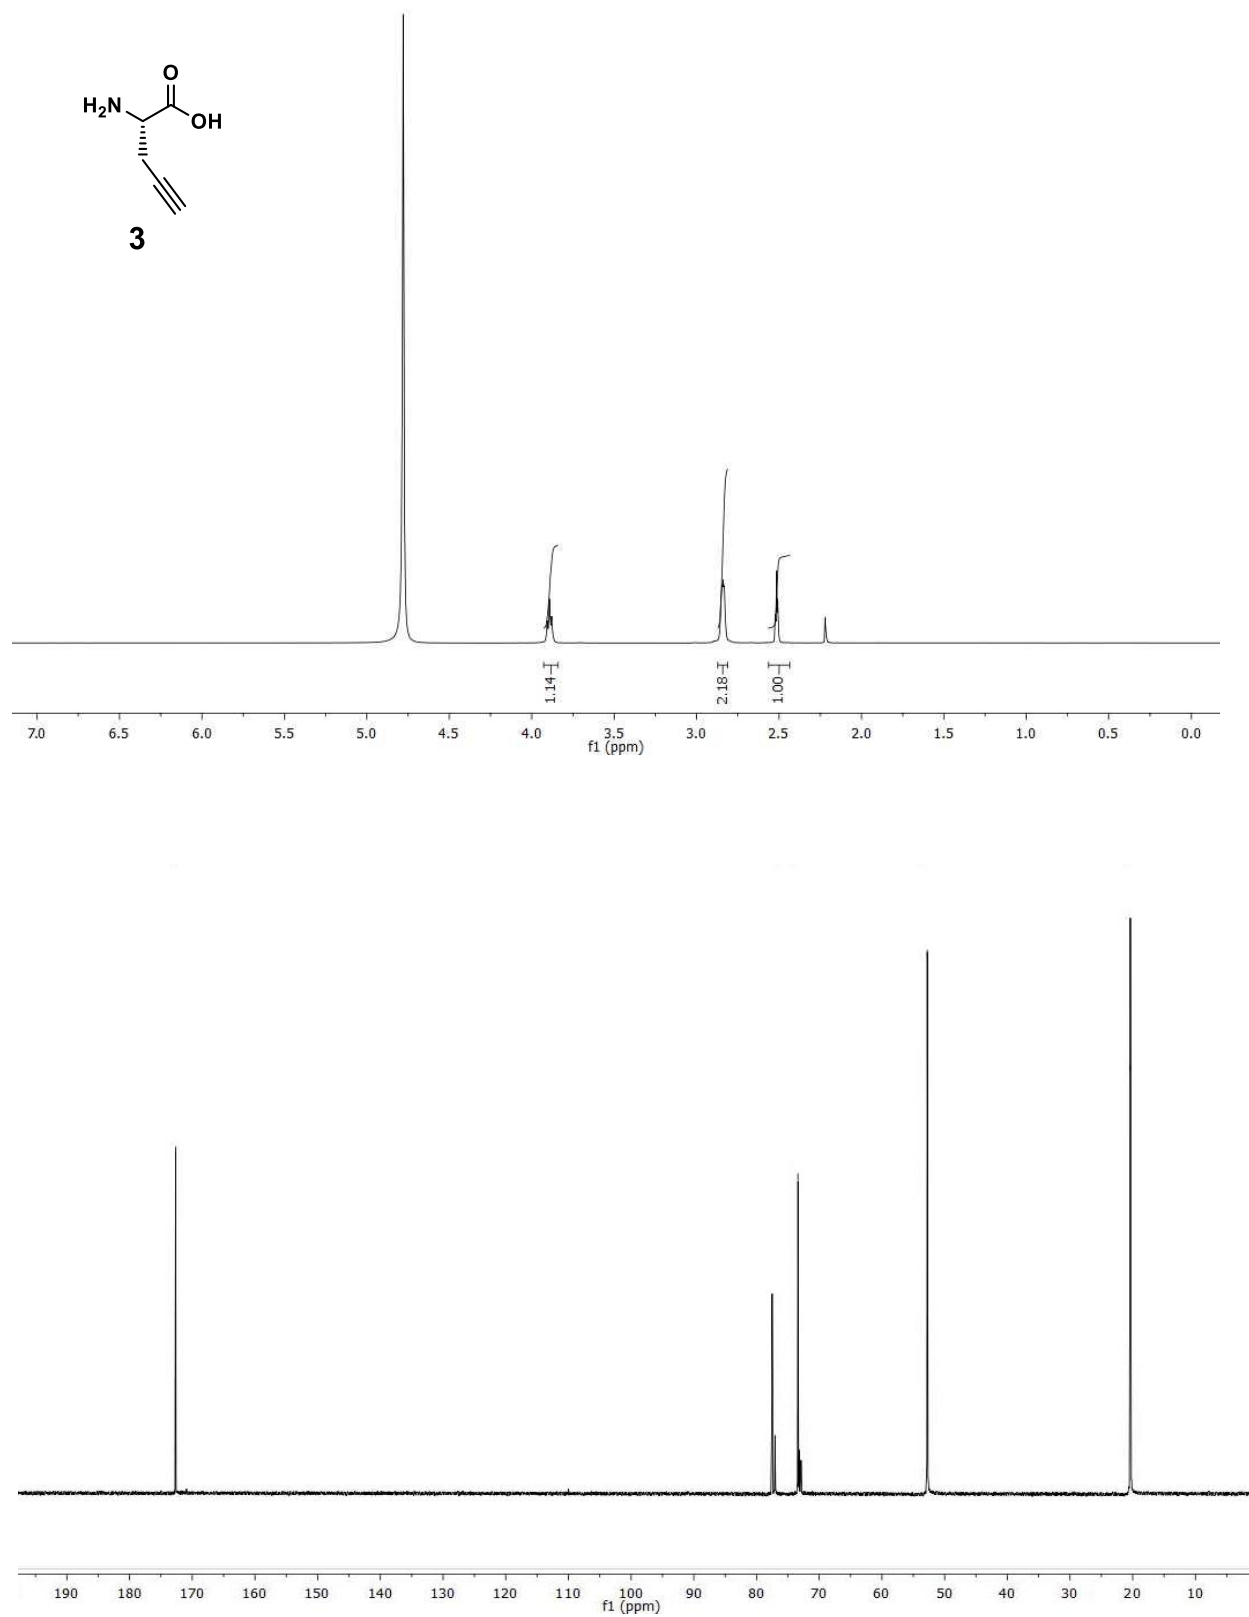

$^1\text{H}$  and  $^{13}\text{C}$  NMR spectra of (propargyl)-AdE (**4**)

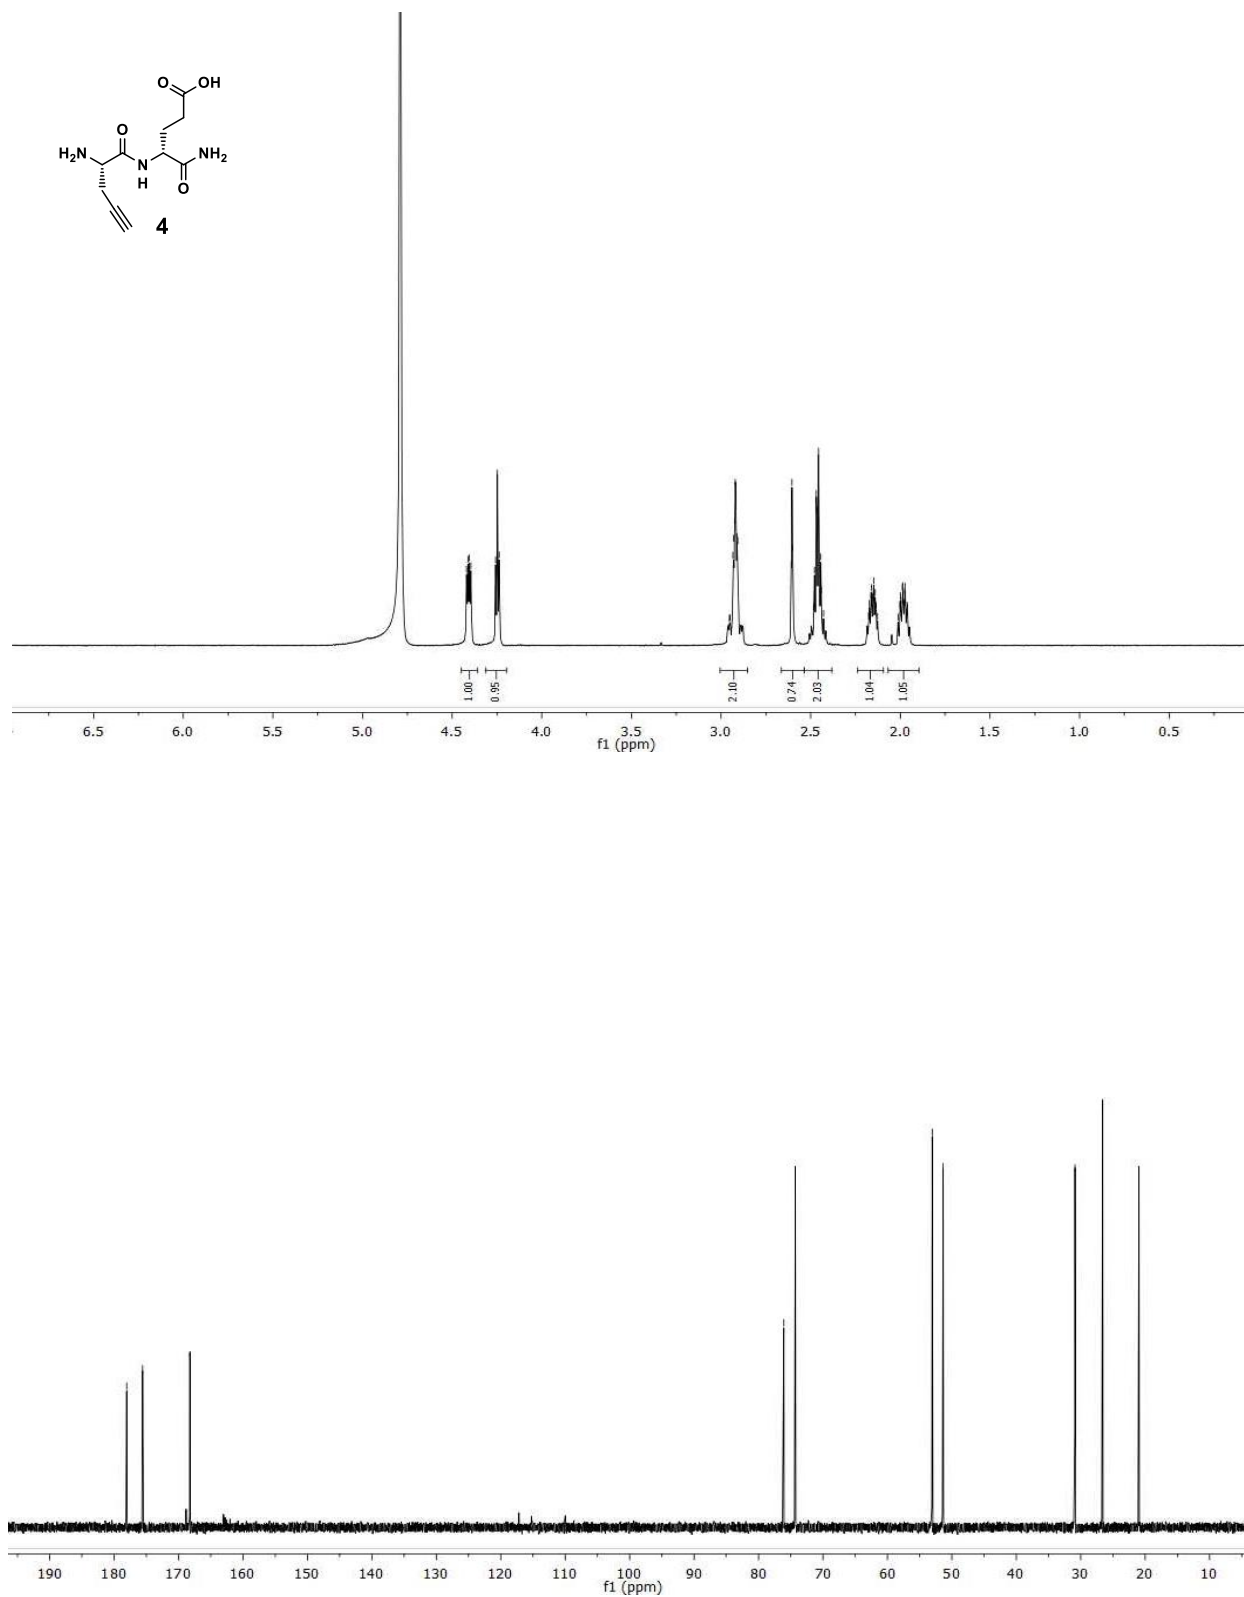

$^1\text{H}$  and  $^{13}\text{C}$  NMR spectra of E-(propargyl)-AKE (**5**)

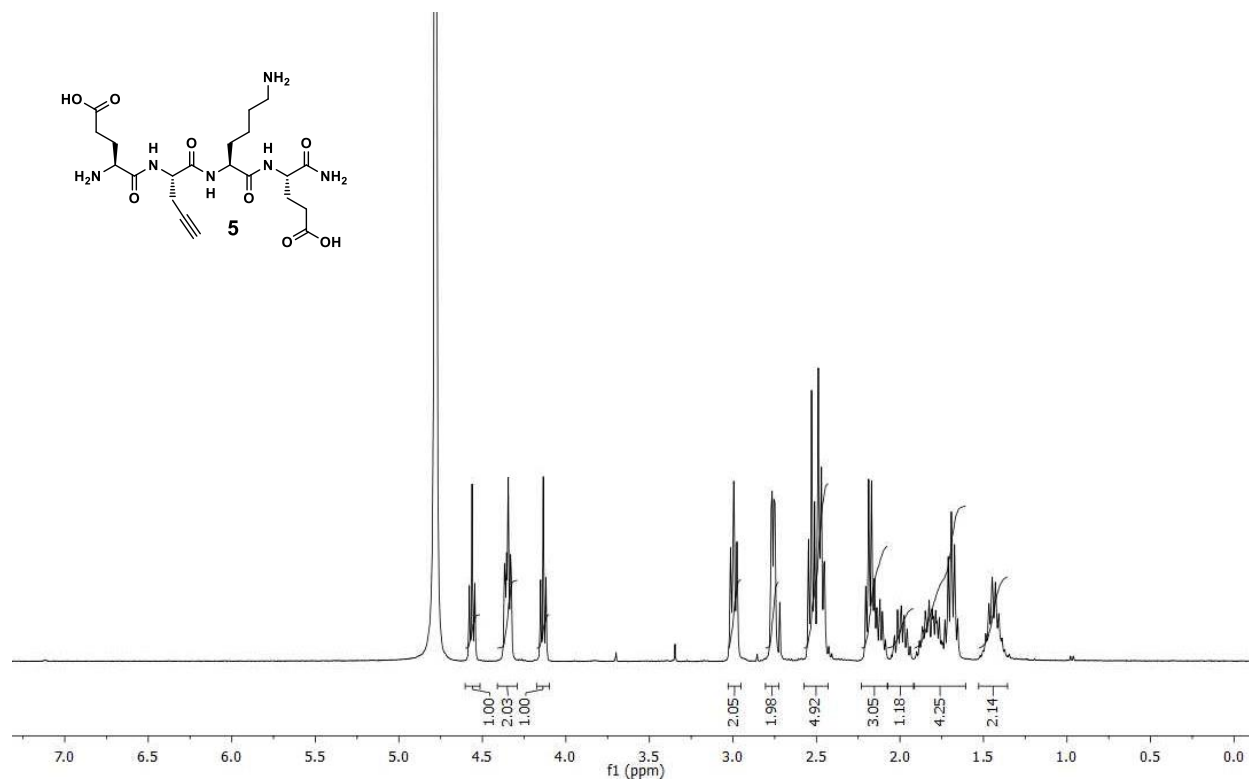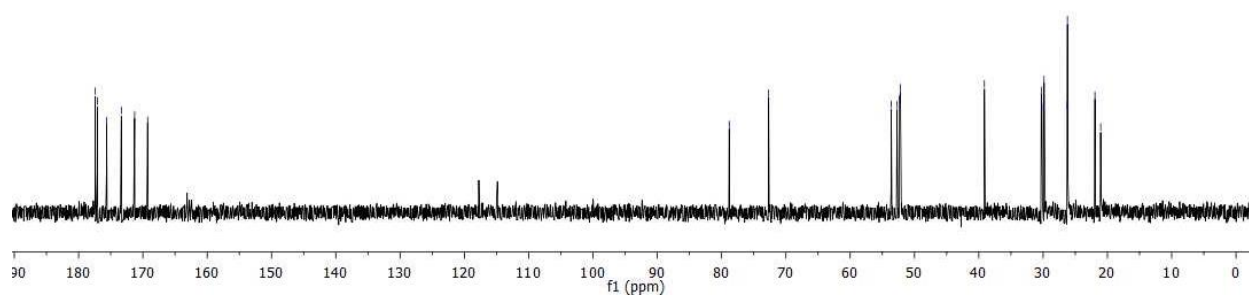



$^1\text{H}$  and  $^{13}\text{C}$  NMR spectra of (TriazoNeu5Ac2en)-AdE (7)

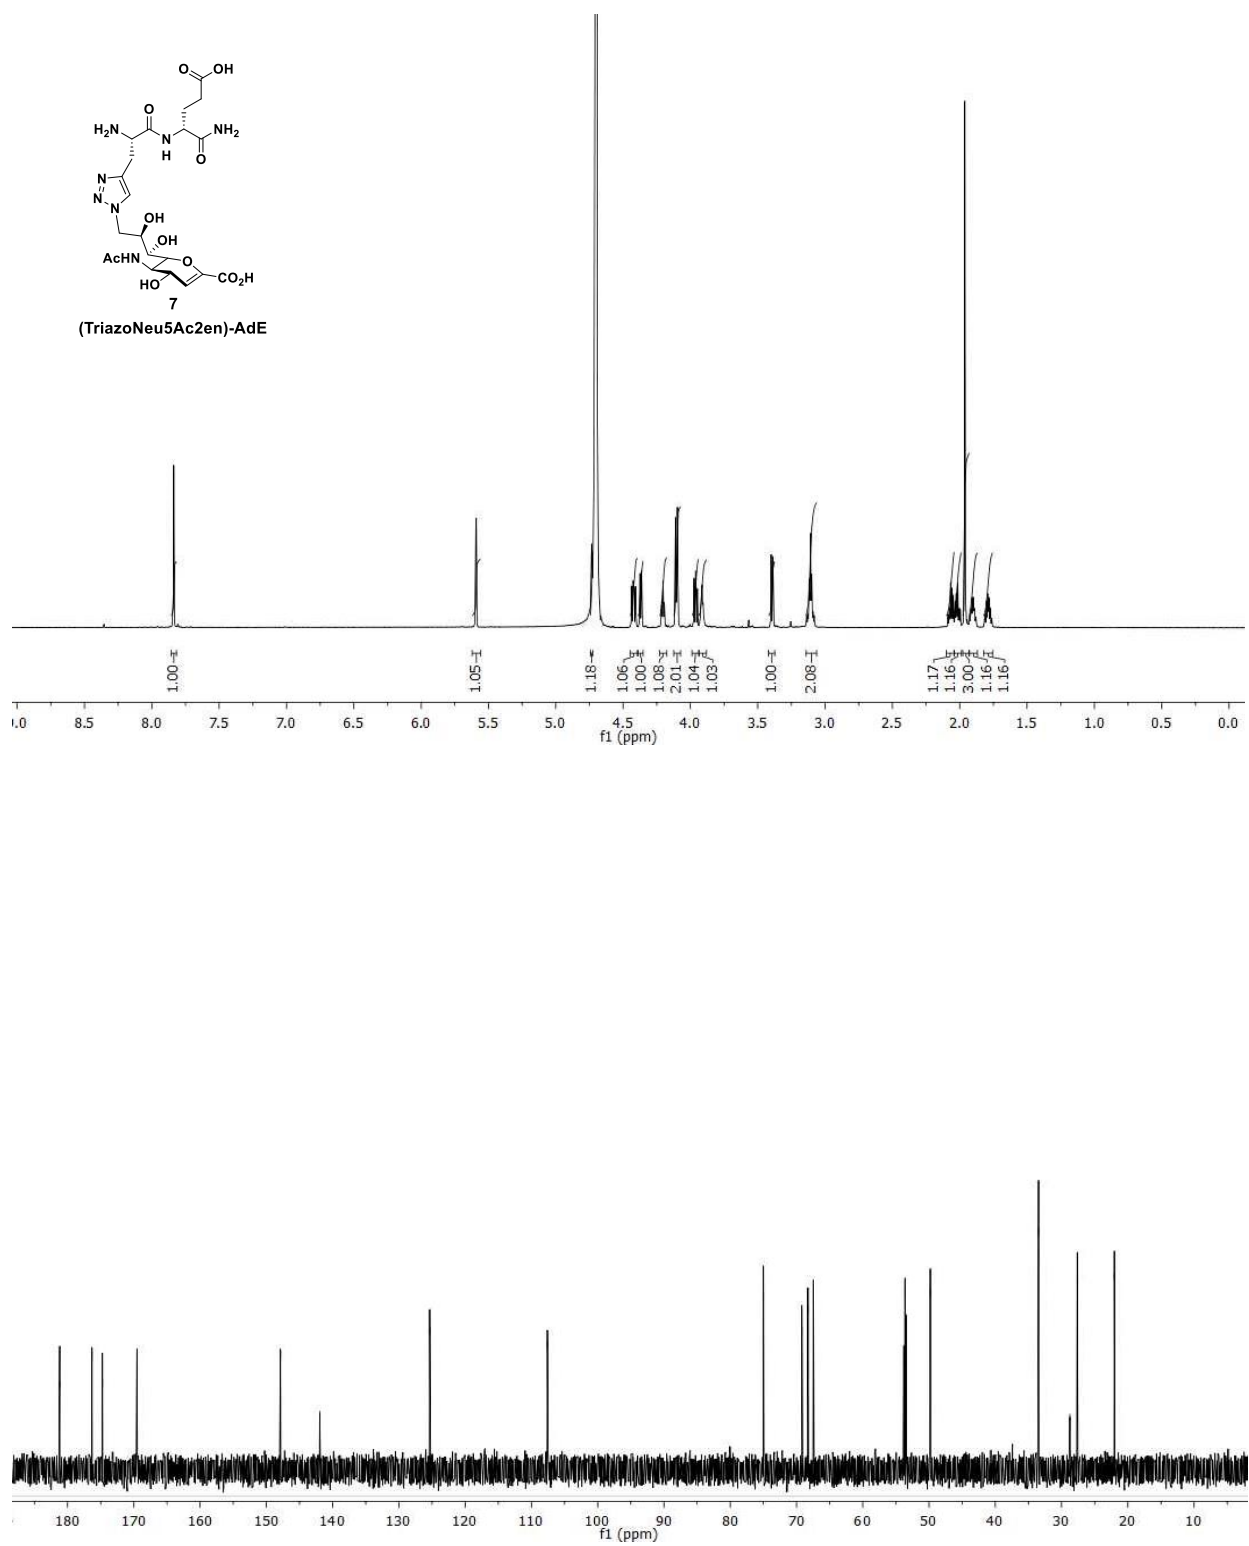

$^1\text{H}$  and  $^{13}\text{C}$  NMR spectra of E-(TriazoNeu5Ac2en)-AKE (**8**)

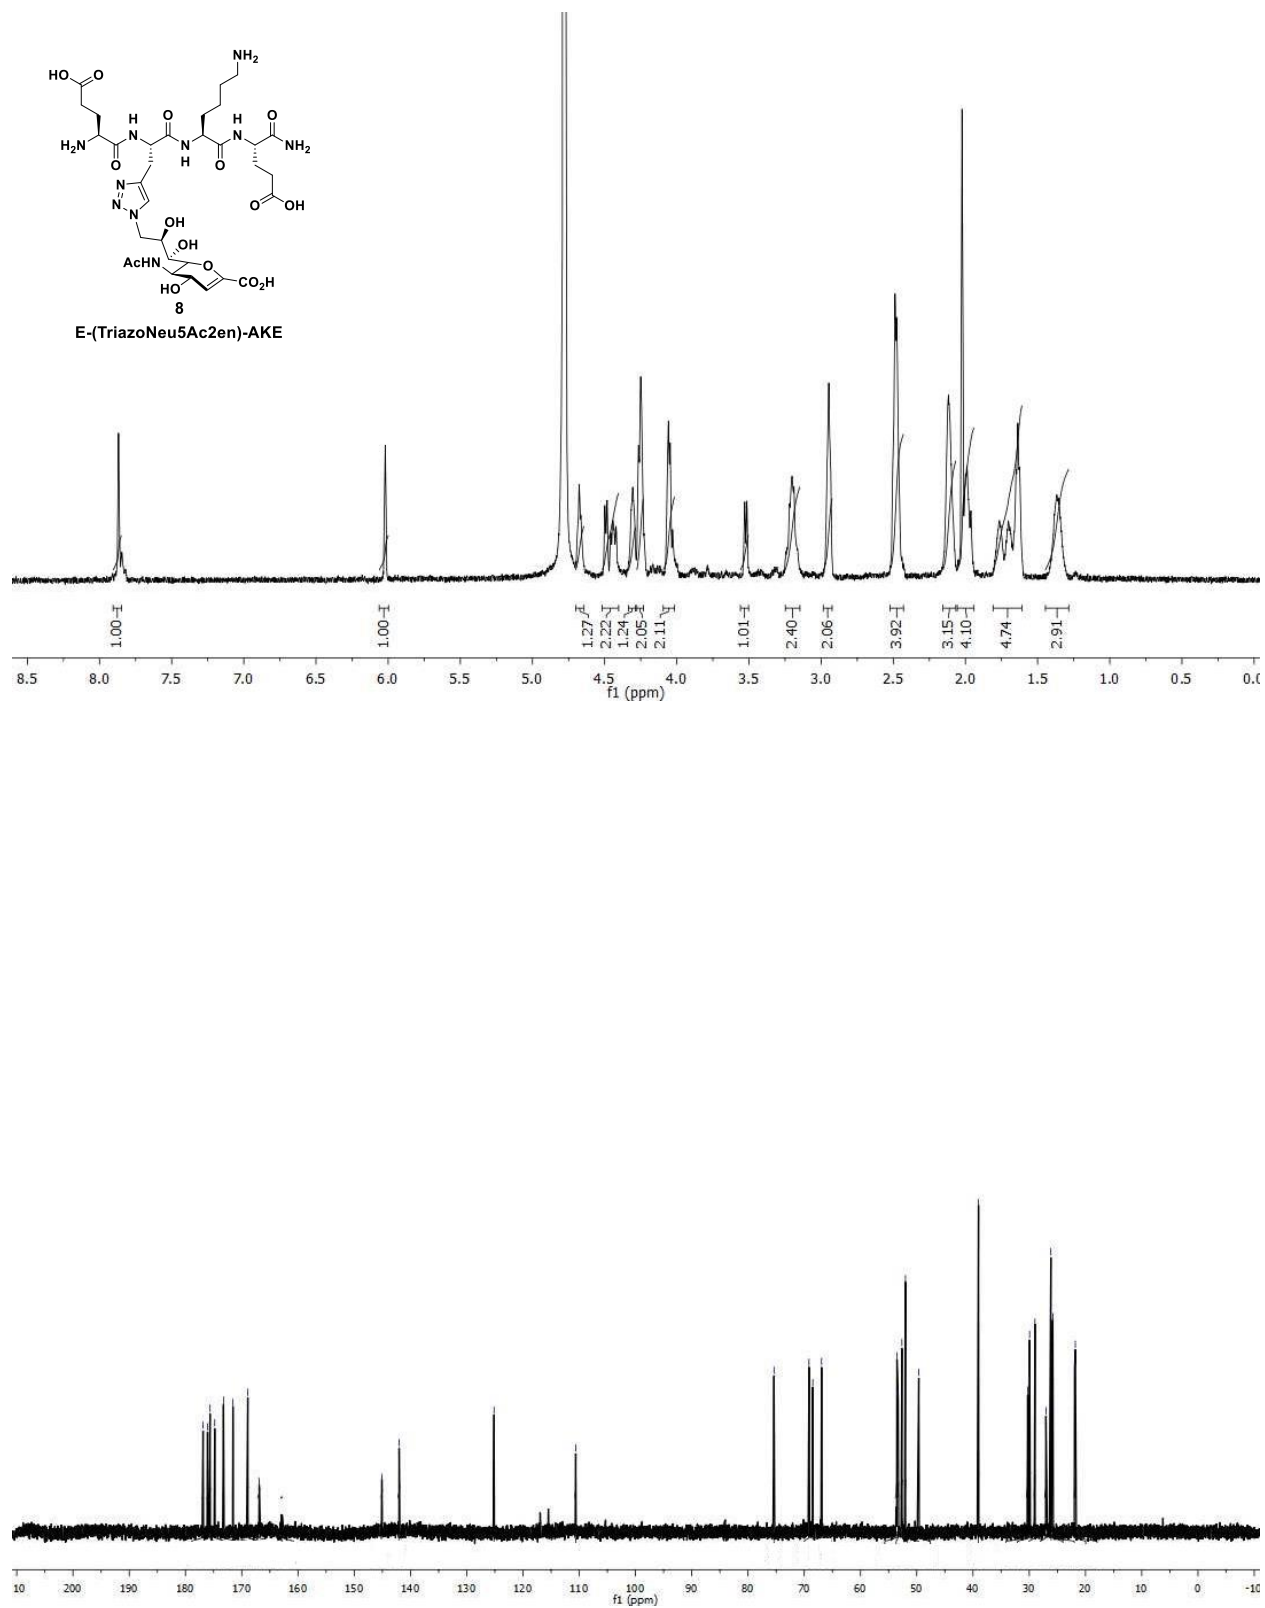

Supplement: NIHMS1511259-supplement-Supporting_Information.pdf [file NIHMS1511259-supplement-Supporting_Information.pdf]
